# Supplementary material for: Effect of Mass Proportion of Municipal Solid Waste Incinerator Bottom Ash Layer to Municipal Solid Waste Layer on the Cu and Zn Discharge from Landfill
Source: Hindawi journal article supplement (doi:10.1155/2016/9687879), 2016-01-01
Supplement: f1 [file 9687879.f1.pdf]

**Effect of mass proportion of municipal solid waste incinerator bottom ash layer  
to municipal solid waste layer on the Cu and Zn discharge from landfill**

Qingna Kong,<sup>A</sup> Jun Yao,<sup>A,B,D</sup> Zhanhong Qiu,<sup>A</sup> and Dongsheng Shen<sup>C</sup>

<sup>A</sup> Center of marine and ecological environment protection, Taizhou University,  
Linhai 317000, China

<sup>B</sup> Department of Environmental Engineering, Zhejiang University, Hangzhou  
310029, China

<sup>C</sup> Zhejiang Provincial Key Laboratory of Solid Waste Treatment and Recycling,  
Zhejiang Gongshang University, Hangzhou, 310018, China

<sup>D</sup> Corresponding author. Email: 18806591228@163.com

**Table S1. Cu concentrations in leachate of R1, R2 and R3 (mg L<sup>-1</sup>).**

| Time | R1                     | R2                       | R3                     |
|------|------------------------|--------------------------|------------------------|
| 1    | 3.14±0.06 <sup>a</sup> | 3.13±0.09 <sup>a</sup>   | 3.06±0.03 <sup>a</sup> |
| 7    | 1.01±0.01 <sup>a</sup> | 1.09±0.01 <sup>a</sup>   | 1.06±0.14 <sup>a</sup> |
| 15   | 1.78±0.00 <sup>b</sup> | 1.16±0.04 <sup>a,b</sup> | 0.78±0.55 <sup>a</sup> |
| 22   | 0.91±0.22 <sup>a</sup> | 0.92±0.03 <sup>a</sup>   | 0.87±0.08 <sup>a</sup> |
| 27   | 0.70±0.07 <sup>a</sup> | 0.62±0.02 <sup>a</sup>   | 0.59±0.04 <sup>a</sup> |
| 37   | 0.52±0.07 <sup>a</sup> | 0.53±0.03 <sup>a</sup>   | 0.48±0.03 <sup>a</sup> |
| 44   | 0.58±0.03 <sup>a</sup> | 0.70±0.14 <sup>a</sup>   | 0.60±0.11 <sup>a</sup> |
| 51   | 0.78±0.04 <sup>a</sup> | 0.80±0.08 <sup>a</sup>   | 0.80±0.01 <sup>a</sup> |
| 59   | 0.42±0.03 <sup>a</sup> | 0.44±0.02 <sup>a</sup>   | 0.51±0.04 <sup>b</sup> |
| 65   | 0.42±0.04 <sup>a</sup> | 0.39±0.01 <sup>a</sup>   | 0.38±0.01 <sup>a</sup> |
| 72   | 0.05±0.01 <sup>a</sup> | 0.09±0.03 <sup>a</sup>   | 0.06±0.04 <sup>a</sup> |
| 79   | 0.01±0.01 <sup>a</sup> | 0.03±0.02 <sup>a</sup>   | 0.02±0.02 <sup>a</sup> |
| 88   | 0.06±0.04 <sup>a</sup> | 0.04±0.01 <sup>a</sup>   | 0.03±0.03 <sup>a</sup> |
| 99   | 0.17±0.01 <sup>a</sup> | 0.33±0.10 <sup>b</sup>   | 0.24±0.03 <sup>b</sup> |
| 110  | 0.17±0.01 <sup>a</sup> | 0.16±0.01 <sup>a</sup>   | 0.16±0.03 <sup>a</sup> |
| 119  | 0.17±0.01 <sup>a</sup> | 0.16±0.02 <sup>a</sup>   | 0.16±0.03 <sup>a</sup> |
| 129  | 0.21±0.03 <sup>a</sup> | 0.24±0.05 <sup>a</sup>   | 0.17±0.03 <sup>a</sup> |
| 144  | 0.52±0.01 <sup>a</sup> | 0.65±0.06 <sup>b</sup>   | 0.53±0.02 <sup>a</sup> |
| 159  | 0.54±0.10 <sup>a</sup> | 0.56±0.01 <sup>a</sup>   | 0.73±0.34 <sup>a</sup> |
| 183  | 0.51±0.01 <sup>a</sup> | 0.49±0.01 <sup>a</sup>   | 0.42±0.10 <sup>a</sup> |
| 200  | 0.77±0.01 <sup>b</sup> | 0.66±0.06 <sup>a</sup>   | 0.64±0.01 <sup>a</sup> |
| 230  | 0.69±0.03 <sup>a</sup> | 0.79±0.02 <sup>b</sup>   | 0.71±0.02 <sup>a</sup> |

a, b indicate the independent variables which were significant at  $P < 0.05$  level.

**Table S2. Calculation of Cu discharge from R1, R2 and R3 (mg)**

| Time  | R1       | R2       | R3       |
|-------|----------|----------|----------|
| 1     | 10.1422  | 10.0786  | 9.2412   |
| 7     | 0.2727   | 0.3052   | 0.23638  |
| 15    | 0.623    | 0.348    | 0.8346   |
| 22    | 0.121    | 0.0544   | 0.06786  |
| 27    | 0.084    | 0.0589   | 0.3704   |
| 37    | 0.0572   | 0.0477   | 0.1648   |
| 44    | 0.08294  | 0.0595   | 0.702    |
| 51    | 0.0897   | 0.0832   | 0.128    |
| 59    | 0.0672   | 0.05368  | 0.0918   |
| 65    | 0.063    | 0.0468   | 0.0589   |
| 72    | 0.0459   | 0.01     | 0.0078   |
| 79    | 0.0105   | 0.0366   | 0.002    |
| 88    | 0.057    | 0.0508   | 0.00285  |
| 99    | 0.0595   | 0.1056   | 0.1944   |
| 110   | 0.0629   | 0.0592   | 0.0448   |
| 119   | 0.0578   | 0.0512   | 0.0448   |
| 129   | 0.0504   | 0.0816   | 0.0459   |
| 144   | 0.13     | 0.234    | 0.1484   |
| 159   | 0.1728   | 0.1512   | 0.2263   |
| 183   | 0.1173   | 0.1323   | 0.105    |
| 200   | 0.1848   | 0.1122   | 0.16     |
| 230   | 0.138    | 0.1738   | 0.11715  |
| Total | 12.68984 | 12.33448 | 12.99534 |

**Table S3. Zn concentrations in leachate of R1, R2 and R3 (mg L<sup>-1</sup>).**

| Time | R1                         | R2                         | R3                        |
|------|----------------------------|----------------------------|---------------------------|
| 1    | 17.06 ± 0.74 <sup>a</sup>  | 19.41 ± 0.00 <sup>b</sup>  | 23.55 ± 0.26 <sup>c</sup> |
| 7    | 14.78 ± 0.13 <sup>a</sup>  | 15.99 ± 1.42 <sup>a</sup>  | 15.21 ± 0.24 <sup>a</sup> |
| 15   | 13.71 ± 0.53 <sup>a</sup>  | 14.19 ± 0.32 <sup>a</sup>  | 13.61 ± 0.27 <sup>a</sup> |
| 22   | 5.97 ± 0.07 <sup>a</sup>   | 6.92 ± 0.51 <sup>b</sup>   | 6.48 ± 0.64 <sup>b</sup>  |
| 27   | 7.24 ± 0.50 <sup>a</sup>   | 6.68 ± 0.39 <sup>a</sup>   | 7.95 ± 1.29 <sup>a</sup>  |
| 37   | 12.13 ± 0.06 <sup>b</sup>  | 14.13 ± 0.05 <sup>c</sup>  | 8.24 ± 0.58 <sup>a</sup>  |
| 51   | 8.48 ± 2.97 <sup>a,b</sup> | 7.28 ± 0.16 <sup>b</sup>   | 5.50 ± 0.43 <sup>a</sup>  |
| 59   | 9.42 ± 0.13 <sup>b</sup>   | 11.22 ± 0.30 <sup>c</sup>  | 6.75 ± 0.19 <sup>a</sup>  |
| 65   | 7.75 ± 0.27 <sup>b</sup>   | 7.51 ± 0.94 <sup>a,b</sup> | 7.03 ± 0.26 <sup>a</sup>  |
| 72   | 10.77 ± 0.13 <sup>a</sup>  | 12.34 ± 0.20 <sup>c</sup>  | 11.77 ± 0.13 <sup>b</sup> |
| 79   | 14.94 ± 0.66 <sup>b</sup>  | 17.20 ± 0.09 <sup>c</sup>  | 13.54 ± 0.34 <sup>a</sup> |
| 88   | 9.16 ± 0.94 <sup>a</sup>   | 9.83 ± 0.19 <sup>a</sup>   | 12.43 ± 0.94 <sup>b</sup> |
| 110  | 7.88 ± 0.47 <sup>b</sup>   | 7.35 ± 0.77 <sup>a</sup>   | 7.79 ± 2.53 <sup>b</sup>  |
| 119  | 6.80 ± 0.28 <sup>c</sup>   | 5.73 ± 0.03 <sup>a</sup>   | 6.25 ± 0.11 <sup>b</sup>  |
| 129  | 6.37 ± 0.02 <sup>b</sup>   | 6.20 ± 0.60 <sup>b</sup>   | 3.75 ± 0.55 <sup>a</sup>  |
| 144  | 3.44 ± 0.47 <sup>a</sup>   | 4.77 ± 0.01 <sup>b</sup>   | 3.69 ± 0.92 <sup>a</sup>  |

|     |                        |                         |                        |
|-----|------------------------|-------------------------|------------------------|
| 159 | 5.31±0.75 <sup>a</sup> | 8.94±1.76 <sup>b</sup>  | 5.16±0.14 <sup>a</sup> |
| 183 | 6.77±0.44 <sup>a</sup> | 11.26±1.01 <sup>c</sup> | 9.04±0.76 <sup>b</sup> |
| 200 | 7.71±1.30 <sup>a</sup> | 10.16±1.28 <sup>b</sup> | 6.84±0.13 <sup>a</sup> |
| 230 | 4.85±0.41 <sup>b</sup> | 7.06±0.80 <sup>c</sup>  | 3.92±0.07 <sup>a</sup> |
| 275 | 4.81±0.31 <sup>b</sup> | 7.01±0.99 <sup>c</sup>  | 3.91±0.31 <sup>a</sup> |

a, b, c indicate the independent variables which were significant at  $P < 0.05$  level.

**Table S4. Calculation of Zn discharge from R1, R2 and R3 (mg)**

| Time  | R1       | R2       | R3       |
|-------|----------|----------|----------|
| 1     | 55.1038  | 62.5002  | 71.121   |
| 7     | 3.9906   | 4.4772   | 3.39183  |
| 15    | 4.7985   | 4.257    | 14.5627  |
| 22    | 1.3134   | 0.91344  | 0.50544  |
| 27    | 0.8688   | 0.6346   | 0.59625  |
| 37    | 1.3343   | 1.2717   | 1.1124   |
| 51    | 0.9752   | 0.75712  | 0.88     |
| 59    | 1.5072   | 1.36884  | 1.215    |
| 65    | 1.1625   | 0.9012   | 1.08965  |
| 72    | 9.88686  | 15.1782  | 1.5301   |
| 79    | 15.687   | 20.984   | 1.353    |
| 88    | 8.702    | 12.4841  | 1.18085  |
| 110   | 2.9156   | 2.7195   | 2.1812   |
| 119   | 2.312    | 1.8336   | 1.75     |
| 129   | 1.5288   | 2.108    | 1.0125   |
| 144   | 0.86     | 1.7172   | 1.0332   |
| 159   | 1.6992   | 2.4138   | 1.5996   |
| 183   | 1.5571   | 3.0402   | 2.26     |
| 200   | 1.8504   | 1.7272   | 1.71     |
| 230   | 0.97     | 1.5532   | 0.6468   |
| 275   | 2.96296  | 2.37639  | 0.72335  |
| Total | 121.9862 | 145.2167 | 111.4549 |

**Table S5. Cu and Zn contents of sub-MSW-layer of R1, R2 and R3 after day 139 (mg kg<sup>-1</sup>).**

| Time | Cu                       |                           |                          | Zn                        |                             |                           |
|------|--------------------------|---------------------------|--------------------------|---------------------------|-----------------------------|---------------------------|
|      | R1                       | R2                        | R3                       | R1                        | R2                          | R3                        |
| 139  | 59.80±15.80 <sup>a</sup> | 58.82±3.79 <sup>a</sup>   | 60.53±0.52 <sup>a</sup>  | 206.68±4.46 <sup>a</sup>  | 212.17±1.78 <sup>b</sup>    | 257.07±55.01 <sup>b</sup> |
| 200  | 54.91±4.44 <sup>a</sup>  | 58.25±5.18 <sup>a,b</sup> | 66.42±10.02 <sup>b</sup> | 198.62±25.08 <sup>a</sup> | 221.25±25.18 <sup>a,b</sup> | 232.58±12.46 <sup>b</sup> |
| 230  | 56.32±4.88 <sup>a</sup>  | 59.33±5.78 <sup>a</sup>   | 70.34±3.45 <sup>b</sup>  | 198.34±4.77 <sup>a</sup>  | 218.67±19.23 <sup>b</sup>   | 242.55±29.30 <sup>b</sup> |

a, b indicate the independent variables which were significant at  $P < 0.05$  level.
